# Supplementary material for: Silk fibroin–carbon nanoparticle composite scaffolds: a cost effective supramolecular ‘turn off’ chemiresistor for nitroaromatic explosive vapours
Source: Royal Society of Chemistry journal article supplement (doi:10.1039/c6tc03337g), 2016-01-01
Supplement: c6tc03337g1.pdf [file c6tc03337g1.pdf]

## Electronic Supporting Information (ESI)

### Silk Fibroin-Carbon Nanoparticle composite Scaffolds: A Cost Effective Supramolecular ‘Turn Off’ Chemiresistor for Nitro aromatic Explosive Vapours

*Sudesna Chakravarty*<sup>1#</sup>, *Nandana Bhardwaj*<sup>2#</sup>, *Biman B. Mandal*<sup>3\*</sup> and *Neelotpal Sen Sarma*<sup>1\*</sup>

#### 1. EDAX Analysis

The increase in deposition of CNPs in SFC arises due to the availability of large surface area arising out of highly macroporous silk scaffolds. The EDAX profiles of SF and SFC are given below (**Fig. S1**).

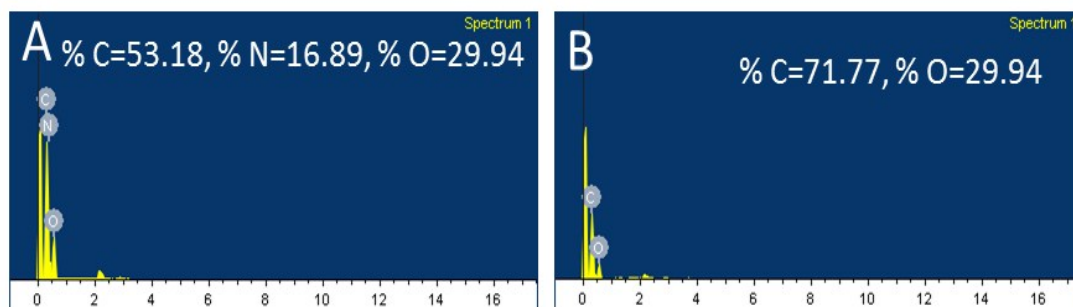

**Fig. S1** EDAX profiles of pristine (A) SF; and (B) SFC showing increase in carbon content in coated sample.

#### 2. TGA Analysis

TGA analysis provided an insight into the thermal stability of SF after deposition of CNPs. It was observed that the SF and SFC are thermally stable upto 250 °C but degradation starts at 260 °C for SF and 284 °C for SFC while complete degradation was observed at 600 °C. The enhancement of thermal stability of SFC can be assigned to reinforcement of SF with CNTs. The thermogram corresponding to SF and SFC is provided in **Fig. S2**.

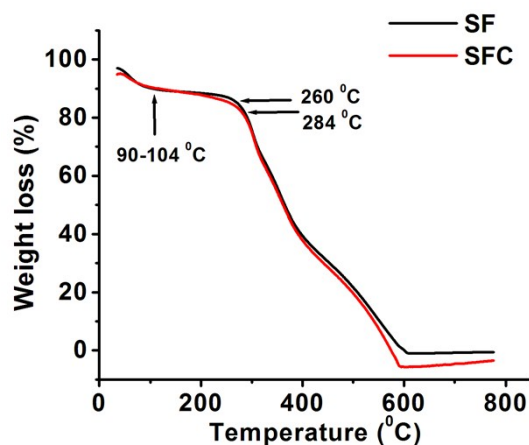

**Fig. S2** TGA of SF and SFC

### 3. %Z vs. conc. of explosive vapors (TNP/TNT)

The variation of % Z with concentrations of TNP and TNT vapors are depicted in **Fig. S3**.

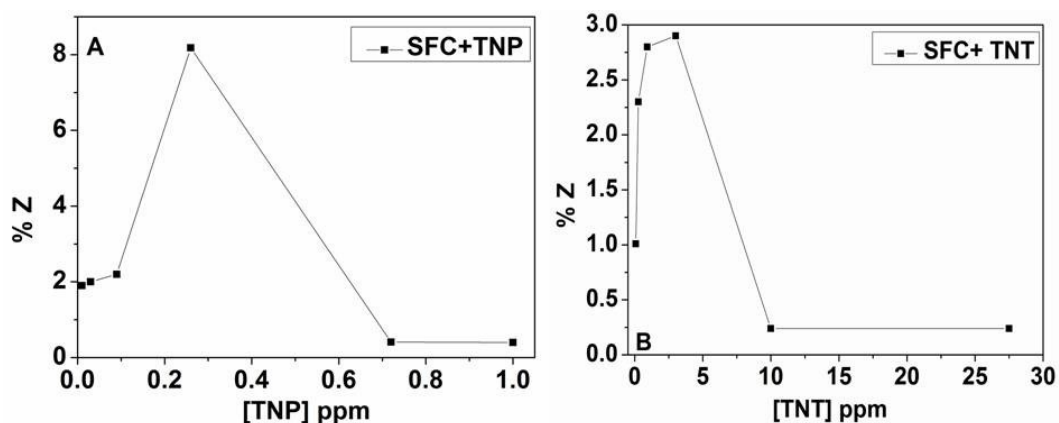

**Fig. S3** Variation of % Z of SFC with (A)TNP and (B) TNT.

### 4. Time interval measurement of SFC with TNP and TNT at different frequencies

The variation of log (Z) of SFCP and SFCT at 100 Hz, 10 KHz and 100 KHz are depicted below in **Fig. S4**.

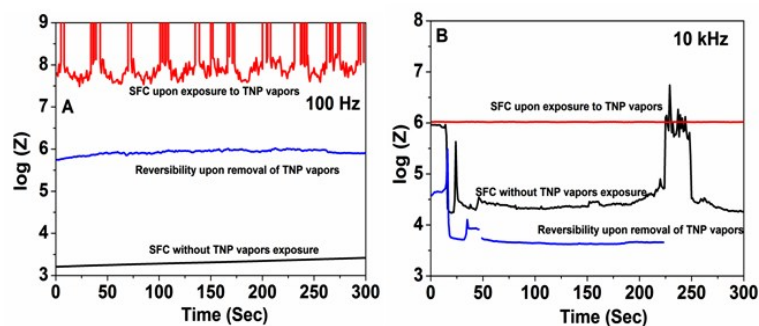

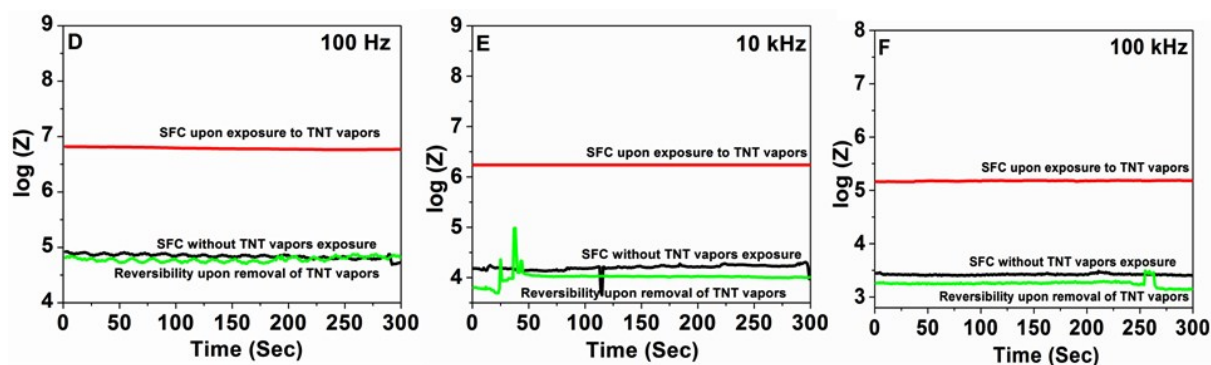

**Fig. S4.** Time interval measurements of SFC with TNP and TNT vapors at 100 Hz, 10 kHz and 100 kHz.

### 5. I-V measurement of SF and SFC

The conductivity switching behavior of SF and SFC are studied in detail. The conductivity change upon coating with CNPs on SF was observed from I-V plot given below in Fig. S5.

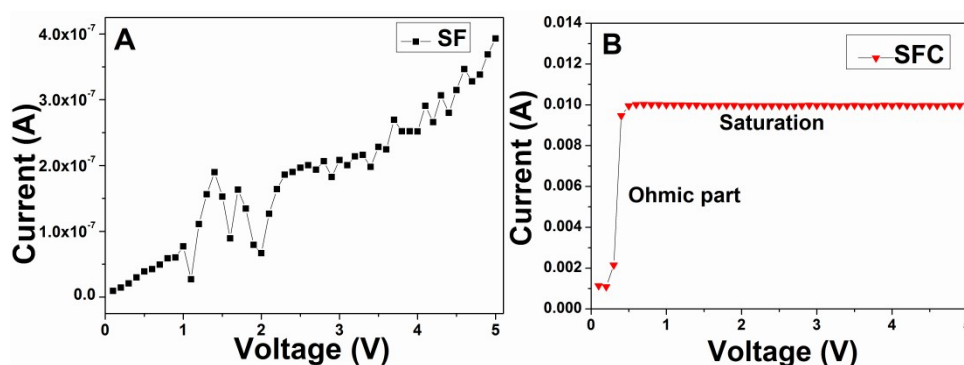

**Fig. S5** I-V plot of A. SF and B. SFC

### 6. Comparative FT-IR of SFC, SFCP and SFCT

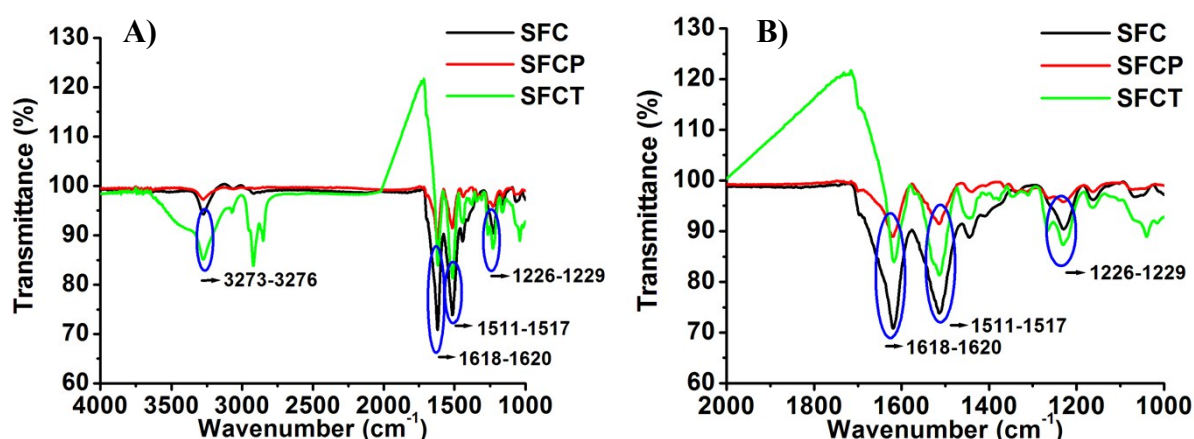

**Fig. S6.** FT-IR spectra showing stretching frequencies of SFC, SFCP and SFCT (A) and narrow range (B).

### 7. TGA plots of SFC, SFCP and SFCT

Thermograms showing thermal stabilities of SFC, SFCP and SFCT (**Fig. S7**).

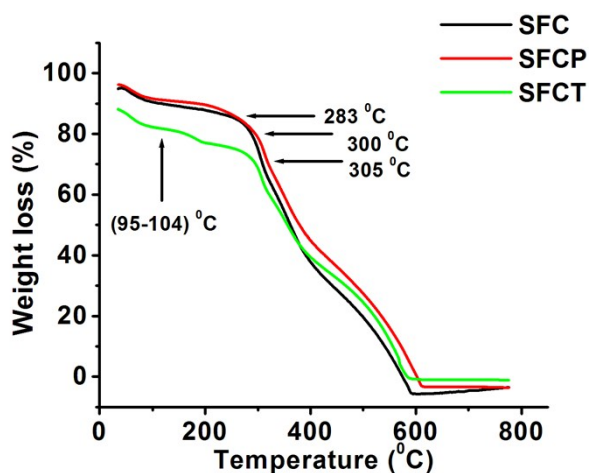

**Fig. S7** Thermograms showing thermal stabilities of SFC, SFCP and SFCT

## 8. Selectivity

The selectivity studies were carried for 2-Nitrophenol (2NP), 4-Nitrophenol (4NP), 1, 4-Dinitrobenzene (DNB), 1,3- dinitrosalicylic acid (DNSA) and Benzene (**Fig. S8**). The sensor was found to be effective for aromatic compounds bearing nitro functionalities.

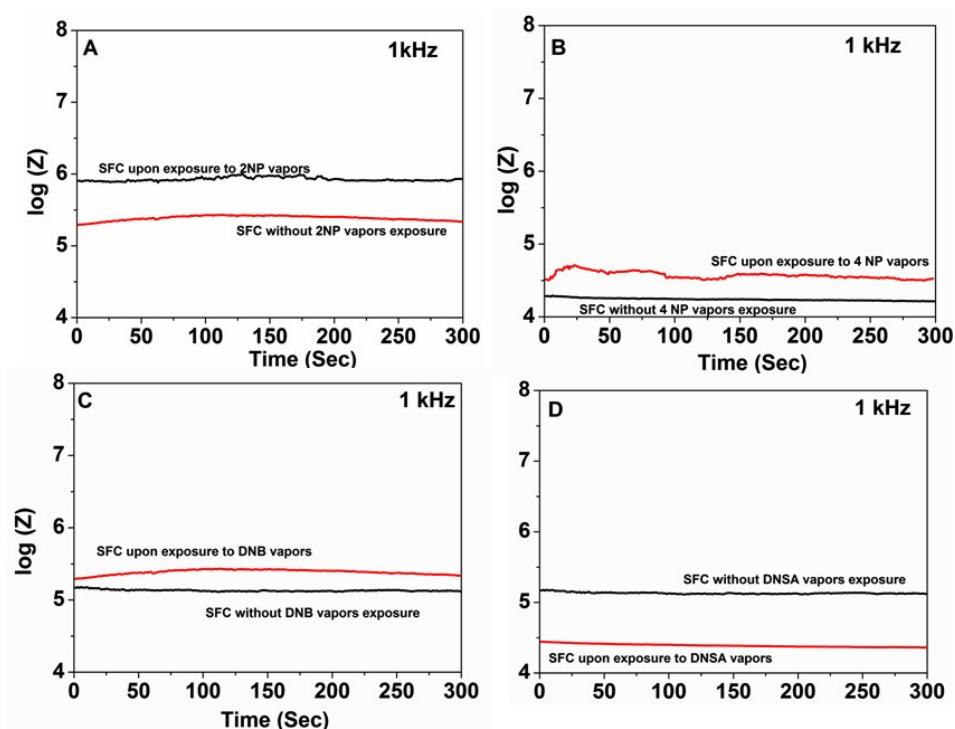

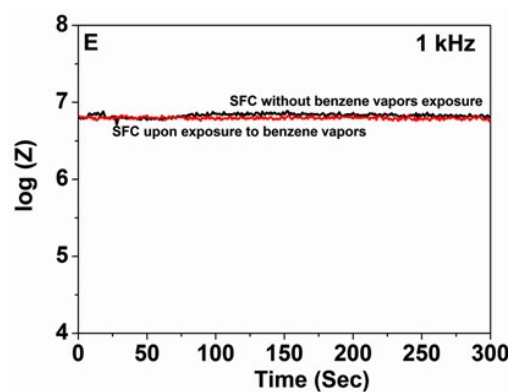

**Fig. S8** Time interval measurements at 1 kHz of SFC with vapors of (A) 2NP; (B) 4NP; (C) DNB; (D) DNSA and (E) Benzene.

### 9. Calibration curve

The calibration curves were constructed for SFCP and SFCT for the calculation of limit of detection (LOD) which were found to be 0.39 ppm for TNP and 4.62 ppm for TNT respectively (**Fig. S9**).

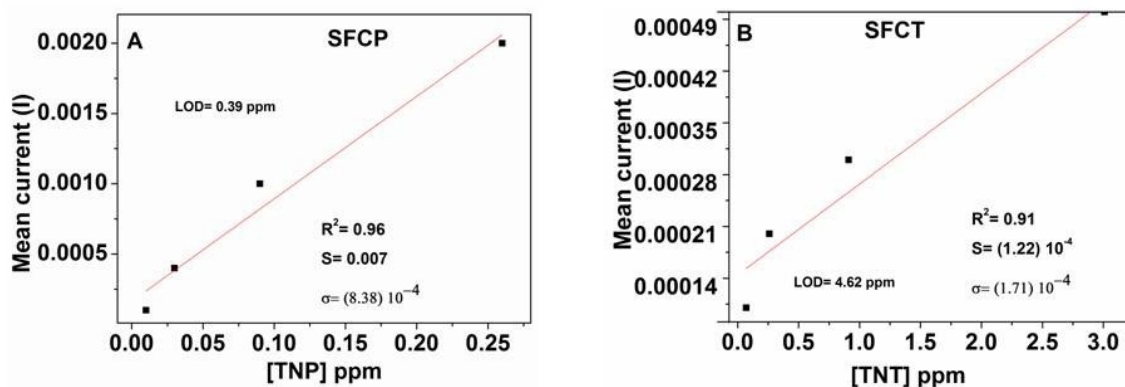

**Fig. S9** Calibration curves for (A) SFCP and (B) SFCT
